# Supplementary material for: Reversible bonding in thermoplastic elastomer microfluidic platforms for harvestable 3D microvessel networks
Source: Royal Society of Chemistry journal article supplement (doi:10.1039/d4lc00530a), 2024-01-01
Supplement: d4lc00530a2.pdf [file d4lc00530a2.pdf]

## Supporting Information

# Reversible Bonding in Thermoplastic Elastomer Microfluidic Platforms for Harvestable 3D Microvessel Networks

Byeong-Ui Moon\*<sup>1,2</sup>, Kebin Li<sup>1,2</sup>, Lidija Malic<sup>1,2,3</sup>, Keith Morton<sup>1,2</sup>, Han Shao<sup>4</sup>, Lauren Banh<sup>5,6,7</sup>, Sowmya Viswanathan<sup>5,6,7</sup>, Edmond W.K. Young<sup>4,5</sup> and Teodor Veres\*<sup>1,2,4</sup>

<sup>1</sup>*Medical Devices, Life Sciences Division, National Research Council of Canada, Boucherville, QC J4B 6Y4, Canada*

<sup>2</sup>*Center for Research and Applications in Fluidic Technologies (CRAFT), Toronto, ON M5S 3G8, Canada*

<sup>3</sup>*Department of Biomedical Engineering, McGill University, Montreal, QC H3A 2B4, Canada*

<sup>4</sup>*Department of Mechanical & Industrial Engineering, University of Toronto, Toronto, ON M5S 3G8, Canada*

<sup>5</sup>*Institute of Biomedical Engineering, University of Toronto, Toronto, ON M5S 3G9, Canada*

<sup>6</sup>*Osteoarthritis Research Program, Division of Orthopedic Surgery, Schroeder Arthritis Institute, University Health Network, ON M5T 0S8, Canada*

<sup>7</sup>*Krembil Research Institute, University Health Network, ON M5T 0S8, Canada*

*\*Co-corresponding authors:*

*E-mails: Ben.Moon@nrc-cnrc.gc.ca, Teodor.Veres@cnrc-nrc.gc.ca*

**Table S1.** Comparison study of oxygen permeability in various materials from literature search

| References                        | PDMS                                                                                                          | TPE                       | PS          |
|-----------------------------------|---------------------------------------------------------------------------------------------------------------|---------------------------|-------------|
| Robb. <sup>1</sup> 1968           | -                                                                                                             | -                         | 0.12 Barrer |
| Merkel et al. <sup>2</sup> 2000   | 800 Barrer (33% silica filler)                                                                                | -                         | -           |
| Lamberti et al. <sup>3</sup> 2014 | 42-131 Barrer (5:1 mixing ratio)<br>270-573 Barrer (10:1 mixing ratio)<br>950-1502 Barrer (20:1 mixing ratio) | -                         | -           |
| Domansky et al. <sup>4</sup> 2017 | -                                                                                                             | 8.9 Barrer (Kraton G1645) | -           |
| McMillan et al. <sup>5</sup> 2021 | 563 Barrer                                                                                                    | 4.04 Barrer (Fluoroflex)  | -           |

1 Barrer =  $10^{-10}$  cm<sup>3</sup> (STP) · cm/cm<sup>2</sup> · s · cm Hg.

**Table S2.** Literature search of the TPE-based microfluidic devices for cell culture and organ-on-a-chip applications

| References                          | Device characteristics                             | Fabrication method                        | Cell culture                                                                     |
|-------------------------------------|----------------------------------------------------|-------------------------------------------|----------------------------------------------------------------------------------|
| Didar et al. <sup>6</sup>           | Multilayer microfluidic device for fluidic control | Hot embossing                             | Oligodendrocyte progenitor cells on chip separation                              |
| Borysiak et al. <sup>7</sup> 2013   | Modified TPE materials with polystyrene content    | Liquid TPE replica molding                | 3T3 fibroblasts and bovine pulmonary arterial endothelial cells on the substrate |
| Domansky et al. <sup>4</sup> 2017   | TPE-TPE thermal bonding                            | Injection molding and extrusion           | Lung epithelial NCI-H441 cells, HUVECs and others cells on the substrate         |
| Lachaux et al. <sup>8</sup> 2017    | TPE-TPE thermal bonding                            | Hot embossing                             | DC 450 yeast cells cell growth and division                                      |
| Lachaux et al. <sup>9</sup> 2019    | TPE membrane-TPE thermal bonding                   | Spin coating process on the epoxy molding | Mononuclear cell culture for adhesion and proliferation                          |
| Schneider et al. <sup>10</sup> 2021 | Polycarbonate/TPE-glass microfluidic device        | Hot embossing                             | HUVECs monolayer                                                                 |
| Schneider et al. <sup>11</sup> 2021 | TPE-PMMA thermal fusion bonding                    | Hot embossing                             | HUVECs culture and monitoring cell metabolism                                    |
| Our work                            | TPE-PS thermal bonding                             | Hot embossing                             | FBs and HUVECs for 3D vessel networks                                            |

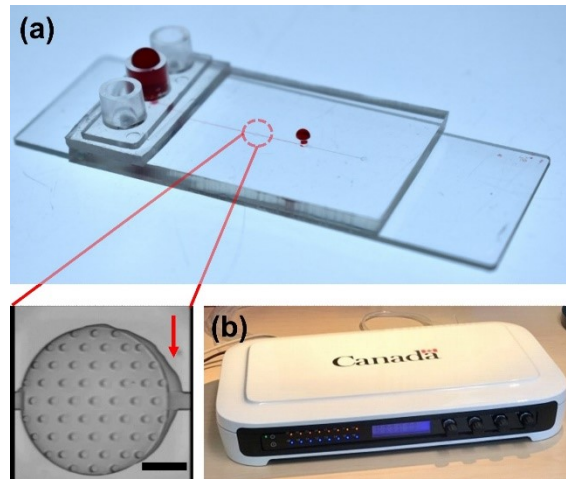

**Figure S1.** Bonding strength measurements. (a) A photograph of an assembled device for delaminating pressure testing. As the applied pressure increases, the TPE chamber begins to delaminate from the PS substrate, as indicated by a red arrow (inset). The scale bar is 200  $\mu\text{m}$ . (b) An in-house-built pneumatic pressure testing box equipped with pressure regulation channels.

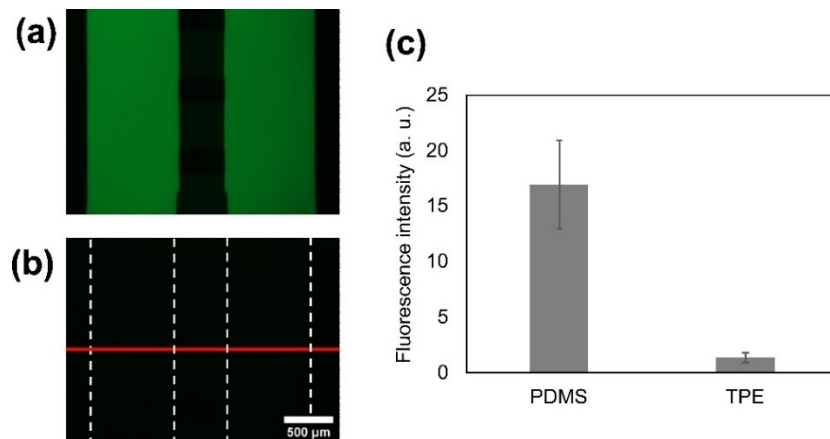

**Figure S2.** Protein absorption study on the PDMS and TPE channels. Two identical microfluidic channels were prepared on both PDMS and TPE slabs and bonded to the glass slide substrate. (a) We introduced a concentration of 1 mg/mL FITC-Dextran (molecular weight 75 kDa) into the devices and incubated them at 37  $^{\circ}\text{C}$  for 5 hr. After the washing step, we captured fluorescence images (b) with PDMS channels and TPE channels. The dashed white lines represent microchannels and the red lines represent a plot line of the fluorescent intensity. (c) Comparison graph of the protein absorption. The PDMS channels show significantly higher protein absorption on the surface compared to the TPE channels ( $n=6$  different channels).

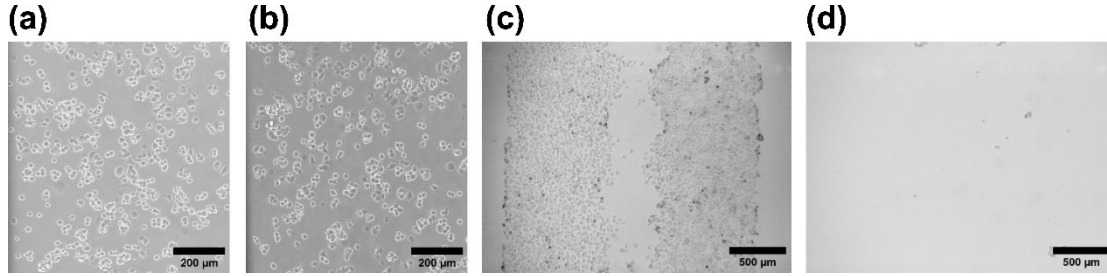

**Figure S3.** TPE-based microfluidic cell culture. Images of MCF-7 cell seeding on different TPE-PS devices (a and b) show the same cell seeding density, with approximately 8,000 cells seeded on each side of the wells. Bright-field images of the patterned cells on the PS substrate after TPE slab removal (c) and after trypsinization (d). A note that the image (d) has a different scale bar compared to Fig. 2(h) in the main text.

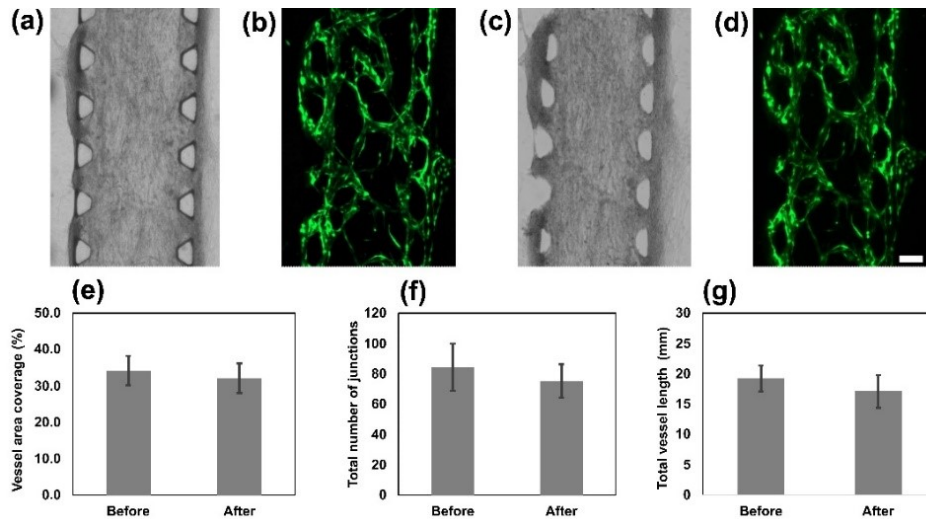

**Figure S4.** Microfluidic-engineered microvessel network structures before (a and b) after (c and d) TPE slab removal. Cultured tissue images of bright-field (a and c) and fluorescence (b and d). Upon TPE slab removal (c and d), the tissue remains intact and the vessel network stays on the PS dish and without damaging vessel networks. (e-g) Comparative analysis of vessel area coverage, total number of vessel network junctions and total vessel length before and after TPE removal. There is no significant difference before and after the TPE removal. (N = 3; mean  $\pm$  SD). The scale bar is 200  $\mu$ m.

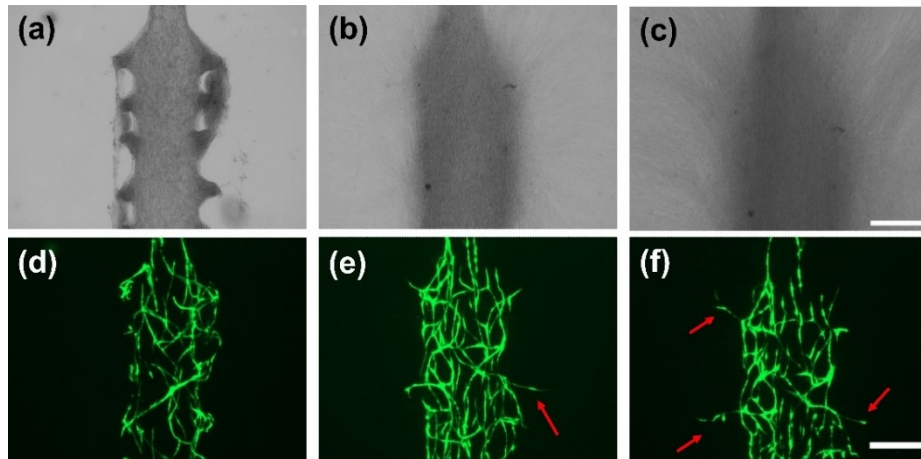

**Figure S5.** Bright-field images of tissue growth after TPE slab removal (a) after removal, (b) 2 days and (c) 4 days of culture and fluorescence images of the microvessel networks (d-f), respectively. Following the TPE removal, the tissue continued to grow outward from the pattern area. Red arrows indicate microvessel growth outside of the patterned area. A note that here, there is no flow and the culture media is an under static flow condition. The scale bars are 500  $\mu\text{m}$ .

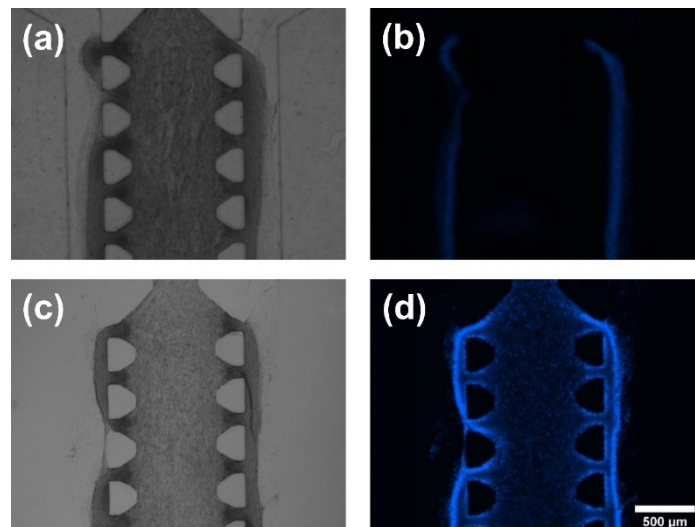

**Figure S6.** A proof-of-principle experiment to demonstrate the difference between staining with irreversibly bonded PDMS devices (a-b) vs. accessible 3D tissue staining after TPE slab removal (c-d). Note there are no open ports and the microvessel networks are not in a perfusable condition in both conditions. (a) An irreversibly-bonded PDMS-glass microfluidic device. (b) Fluorescence image showing only the tissue near channel boundaries are stained due to lack of access of staining solution to tissue core. (c) A reversibly-bonded TPS-PS microfluidic device after the TPE slab removal. (d) Fluorescence image showing that the entire tissue on the PS substrate was fully stained.

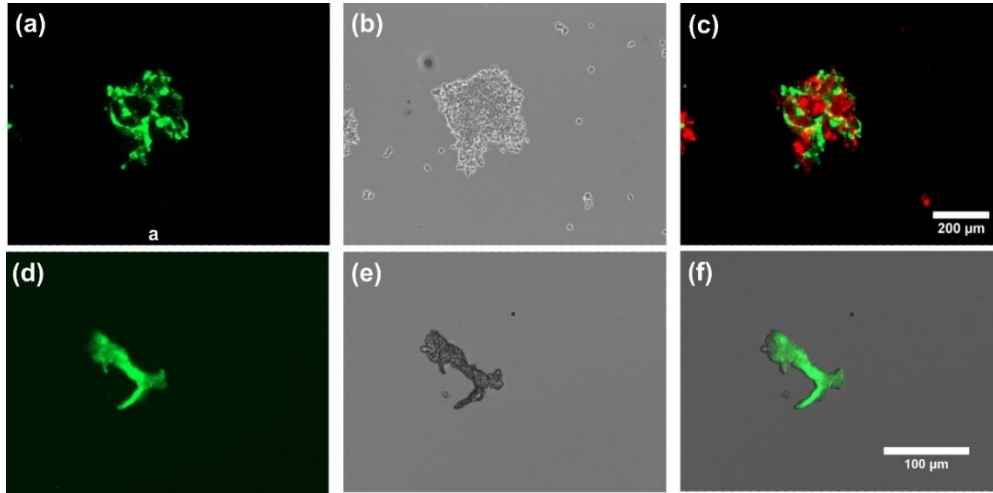

**Figure S7.** Images of harvested microvessel segments with fibroblasts (a-c) and microvessel fragments (b-d). Microvessel segments are shown in GFP images (a, d), bright-field images (b, e), and merged images (c, f). The tissue digestion process involves tissue collection from the microfluidic devices, and dissociating it in a BAS-PBS solution containing Collagenase type I (2 mg/mL) and DNase I (1 mg/mL). Throughout the centrifugation step, the dissociated segments were pooled and collected for imaging.

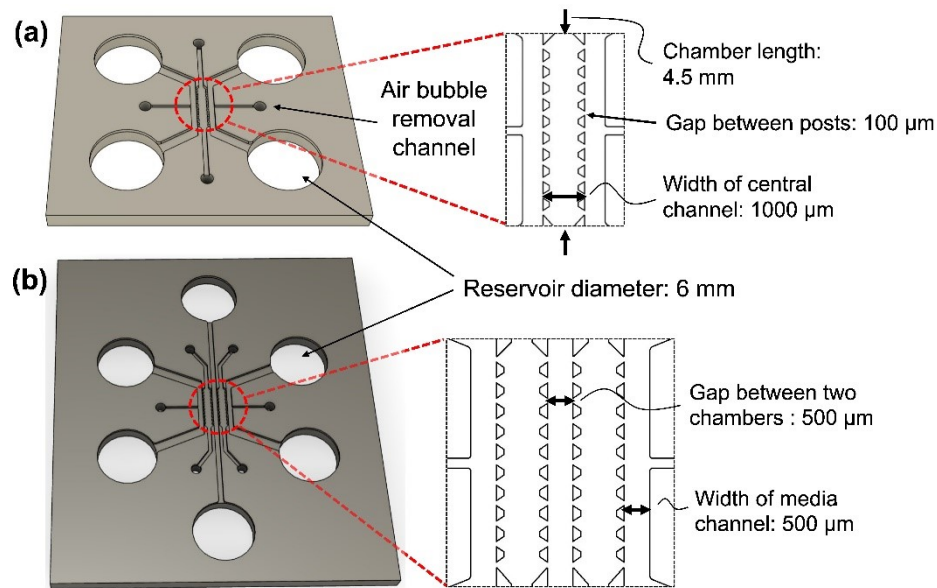

**Figure S8.** Designs of (a) single vessel loading and (b) multi-vessel loading chambers. Key dimensions of TPE slabs are depicted as: width of the cell loading channel = 1000  $\mu\text{m}$ , width of the media flowing channels = 500  $\mu\text{m}$ , gap between posts = 100  $\mu\text{m}$ , gap between two chambers of the multi-vessel loading design = 500  $\mu\text{m}$ , length of the chamber = 4.5 mm, reservoir diameter = 6 mm, inlet and outlet diameters = 1 mm, and height of the channel = 130  $\mu\text{m}$ .

## References:

- 1 W. L. Robb, *Ann. N. Y. Acad. Sci.*, 1968, **146**, 119–137.
- 2 T. C. Merkel, V. I. Bondar, K. Nagai, B. D. Freeman and I. Pinnau, *J. Polym. Sci., Part B: Polym. Phys.*, 2000, **38**, 415–434.
- 3 A. Lamberti, S. L. Marasso and M. Cocuzza, *RSC Adv.*, 2014, **4**, 61415–61419.
- 4 K. Domansky, J. D. Sliz, N. Wen, C. Hinojosa, G. Thompson, J. P. Fraser, T. Hamkins-Indik, G. A. Hamilton, D. Levner and D. E. Ingber, *Microfluid. and Nanofluidics*, 2017, **21**, 107.
- 5 A. H. McMillan, J. Mora-Macías, J. Teyssandier, R. Thür, E. Roy, I. Ochoa, S. De Feyter, I. F. J. Vankelecom, M. B. J. Roeffaers and S. C. Leshner-Pérez, *Nano Select*, 2021, **2**, 1385–1402.
- 6 T. F. Didar, K. Li, T. Veres and M. Tabrizian, *Biomaterials*, 2013, **34**, 5588–5593.
- 7 M. D. Borysiak, K. S. Bielawski, N. J. Sniadecki, C. F. Jenkel, B. D. Vogt and J. D. Posner, *Lab Chip*, 2013, **13**, 2773–2784.
- 8 J. Lachaux, C. Alcaine, B. Gómez-Escoda, C. M. Perrault, D. O. Duplan, P. Y. J. Wu, I. Ochoa, L. Fernandez, O. Mercier, D. Coudreuse and E. Roy, *Lab Chip*, 2017, **17**, 2581–2594.
- 9 J. Lachaux, H. Salmon, F. Loisel, N. Arouche, I. Ochoa, L. L. Fernandez, G. Uzan, O. Mercier, T. Veres and E. Roy, *Adv. Mater. Technol.*, 2019, **4**, 1800308.
- 10 S. Schneider, E. J. S. Brás, O. Schneider, K. Schlünder and P. Loskill, *Micromachines*, 2021, **12**, 575.
- 11 S. Schneider, M. Bubeck, J. Rogal, H. J. Weener, C. Rojas, M. Weiss, M. Heymann, A. D. van der Meer and P. Loskill, *Lab Chip*, 2021, **21**, 3963–3978.
